# Supplementary material for: Peptide linked perylene bisimide and diketopyrrolopyrrole: design, synthesis and investigation of mechanofluorochromism
Source: Royal Society of Chemistry journal article supplement (doi:10.1039/d2ma00829g), 2022-01-01
Supplement: d2ma00829g1.pdf [file d2ma00829g1.pdf]

## Supporting Information

D. Venkateswarlu,<sup>a,b</sup> T. Swetha<sup>a</sup> Rajamouli Boddula,<sup>a</sup> Surya Prakash Singh<sup>\*a,b</sup>

<sup>a</sup>Polymers and Functional Materials Division, CSIR-Indian Institute of Chemical Technology, Uppal road, Tarnaka, Hyderabad-500007, India

<sup>b</sup>Academy of Scientific and Innovative Research (AcSIR), Ghaziabad, Uttar Pradesh, India- 201002.

\* E-mail : [spsingh@iict.res.in](mailto:spsingh@iict.res.in)

## Table of Contents

|                                                                                                                                                                            |     |
|----------------------------------------------------------------------------------------------------------------------------------------------------------------------------|-----|
| Synthetic Procedure .....                                                                                                                                                  | S3  |
| Synthesis of Boc-Glycine (Compound 1):.....                                                                                                                                | S3  |
| Synthesis of L-Di benzyl aspartate (Compound 2):.....                                                                                                                      | S3  |
| Synthesis of Dibenzyl 2-(2-((tert-butoxycarbonyl) amino) acetamido) succinate (Compound 3): .....                                                                          | S4  |
| Synthesis of Dibenzyl 2-(2-aminoacetamido) succinate (Compound 4): .....                                                                                                   | S4  |
| Alkylated Perylene di benzoic acid (Compound 5): .....                                                                                                                     | S5  |
| Synthesis of Perylene di peptide (PDI-PEP):.....                                                                                                                           | S6  |
| Di peptide thiophene di ketopyrrolopyrrole (DPP-PEP): .....                                                                                                                | S6  |
| Computational Details .....                                                                                                                                                | S7  |
| Figure S1. UV absorption images of the molecules of PDI-PEP (a,b) and DPP-PEP (c,d) under normal light and 365 nm.....                                                     | S8  |
| Figure S2. Normalized plots of experimental and simulated absorption spectra of (A) DPP-PEP (B) PDI-PEP.....                                                               | S8  |
| Figure S3. (a) Cyclic voltammogram (b) Energy level diagram of PDI-PEP and DPP-PEP.....                                                                                    | S9  |
| Figure S4. Aggregated emission in THF in water (fw) for PDI-PEP a) absorption and b) emission .....                                                                        | S9  |
| Figure S5. Aggregated emission in THF in water (fw) for DPP-PEP a) absorption and b) emission. ....                                                                        | S9  |
| Figure S6: Chemical Structures of the Dopants.....                                                                                                                         | S10 |
| Figure S7. PXRD analysis of the molecules for comparison with different dopants, a) PDI-PEP and 2) DPP-PEP. ....                                                           | S10 |
| Figure S8. Halochromism effect of DPP-PEP, 1. Grinding, 2. TFA addition, 3. After 2 mins, 4. After 10 mins, 5. After few mins. ....                                        | S10 |
| Table S1. Optical Parameters of DPP-PEP and PDI-PEP .....                                                                                                                  | S11 |
| Table S2. Solvatochromism UV absorption, emission and their molar extinction coefficient values of the DPP-PEP and PDI-PEP. ....                                           | S11 |
| Table S3. Experimental $\lambda_{max}$ , calculated $\lambda_{max}$ , (nm) and oscillator strengths (f) of DPP-PEP in DCM solvent, calculated at B3LYP/6-311g (d,p): ..... | S12 |
| Table S4. Experimental $\lambda_{max}$ , calculated $\lambda_{max}$ , (nm) and oscillator strengths (f) of PDI-PEP in DCM solvent, calculated at B3LYP/6-311g (d,p): ..... | S13 |
| Table S5. Molecular orbital pictures of DPP-PEP calculated at B3LYP/6-311g (d,p) level of theory. ....                                                                     | S14 |
| Table S6. Molecular orbital pictures of PDI-PEP calculated at B3LYP/6-311 g (d,p) level of theory. ....                                                                    | S15 |
| Table S7. Aggregation emission and respective UV absorption of the DPP-PEP and PDI-PEP. ....                                                                               | S16 |
| Table S8. TCPSC life-time data of d PDI-PEP.....                                                                                                                           | S16 |
| Table S9. TCPSC life-time data of d DPP-PEP.....                                                                                                                           | S17 |
| Table S10. TCPSC life-time data of d DPP-PEP and PDI-PEP in various solvents. ....                                                                                         | S17 |
| NMR, Mass Spectra:.....                                                                                                                                                    | S18 |
| References.....                                                                                                                                                            | S25 |

## 1. Synthetic Procedure

### Synthesis of Boc-Glycine (Compound 1):

2g (26.3 mol) of glycine was dissolved in 60 mL of 1,4 dioxane: Water (2:1). To this solution was added 1.164g (26.6 mol) of Sodium hydroxide. The solution was cooled to 0°C. To this solution 6.4g (29.2 mol) BOC-anhydride was added in portion wise. The solution was allowed to room temperature and stirred for 1hr. After completion of the reaction the solvent was removed by vacuum, the resultant residue was dissolved in 100 mL H<sub>2</sub>O and washed with 2 portions of 50 ml EtOAc. The aq. solution was acidified using conc. HCl to PH 1-2. The aqueous fraction was extracted with three portions of 75 ml EtOAc. The organic fraction was dried over Na<sub>2</sub>SO<sub>4</sub> and concentrated using rotary evaporator to get the compound 1. Yield:80%  
<sup>1</sup>H NMR (500 MHz, CDCl<sub>3</sub>, δ): 9.00-8.80 (s,1H), 3.86- 4.00 (m, 2H), 1.50 (s, 9H), <sup>13</sup>C (65 MHz, CDCl<sub>3</sub>, δ): 174.29, 155.67, 80.47, 42.42, 28.31. Cal. Mass: 175.08 Found: 197 (M+Na)

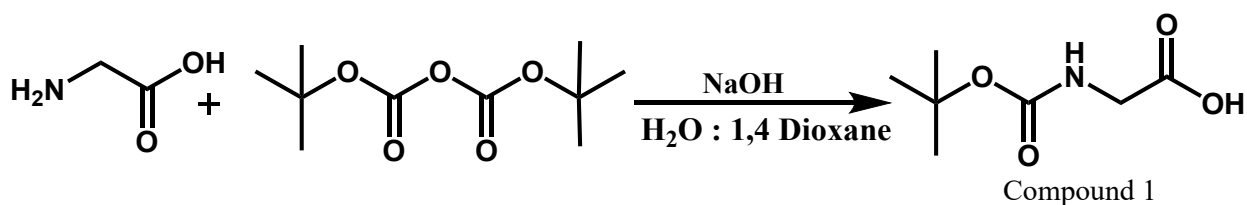

### Synthesis of L-Dibenzyl aspartate (Compound 2):

A mixture of L-aspartic acid (12.5g, 0.095 mol) and benzyl alcohol (30 mL), p-tolyl sulfonic acid monohydrate (19.0g, 0.1 mol) and (150 mL) of benzene was refluxed for 8 hrs using a dean stark apparatus. After getting in to the rt ether (150 mL) was added and stirred until to get the white ppt. The ppt was filtered off and washed with ether. The collected white solid was mixed with (200 mL) of water and treated with a saturated solution of NaHCO<sub>3</sub> (200 mL). The mixture was extracted with CHCl<sub>3</sub> (3x200 ml). The collected organic phase was dried over Na<sub>2</sub>SO<sub>4</sub>, filtered and concentrated under reduced pressure to afford the title compound as a color less oil. Yield: 90%

<sup>1</sup>H NMR (400 MHz, CDCl<sub>3</sub>, δ): 8.38 (s, 2H), 7.68 (s, 1H), 7.34-6.98 (m, 9H), 5.02-4.80 (m, 2H), 4.65 (s, 2H), 3.43 (s, 2H), 3.14-2.90 (m, 1H), <sup>13</sup>C (100 MHz, CDCl<sub>3</sub>, δ): 169.829, 167.741, 140.808, 129.713, 128.466, 127.537, 126.932, 125.893, 125.237, 65.171, 49.557, 33.583. Cal. Mass: 313.13 Found: 314 (M+1)

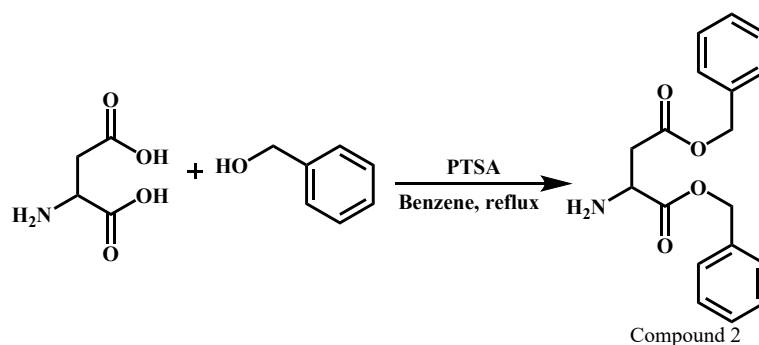

### Synthesis of Dibenzyl 2-(2-((tert-butoxycarbonyl) amino) acetamido) succinate (Compound 3):

1g (5.71 mol) of Boc-glycine was dissolved in 40 mL of DCM. To this reaction mixture L-di benzyl aspartic ester 2.6g (8.5 mol) was added and the solution was stirred at rt for 20 min. To this solution DCC (0.30g) and N-hydroxy succinimide (0.900g, 8.5 mol) N-methyl morpholine (2 mL) was added then the mixture was stirred for 14 hrs at rt. White precipitate was removed by filtration, and the resulting crude material was purified by column chromatography (Hexane: EtOAc 5:1). We went to the next step without further purification. Yield: 70 %.

$^1\text{H}$  NMR (400 MHz,  $\text{CDCl}_3$ ,  $\delta$ ): 7.35-7.30 (m, 6H), 7.26-7.20 (m, 4H), 5.24-5.04 (m, 1H), 4.65-4.56 (s, 4H), 3.88-3.76 (m, 2H), 3.40-3.20 (m, 2H), 1.44-1.40 (s, 9H),  $^{13}\text{C}$  (100  $\text{CDCl}_3$ ,  $\delta$ ): 170.869, 170.269, 155.749, 140.822, 135.100, 128, 359, 127.388, 126.849, 71.949, 64.936, 52.131, 50.382, 42.121, 28. 172. Cal. Mass: 470.82, Found: 471.

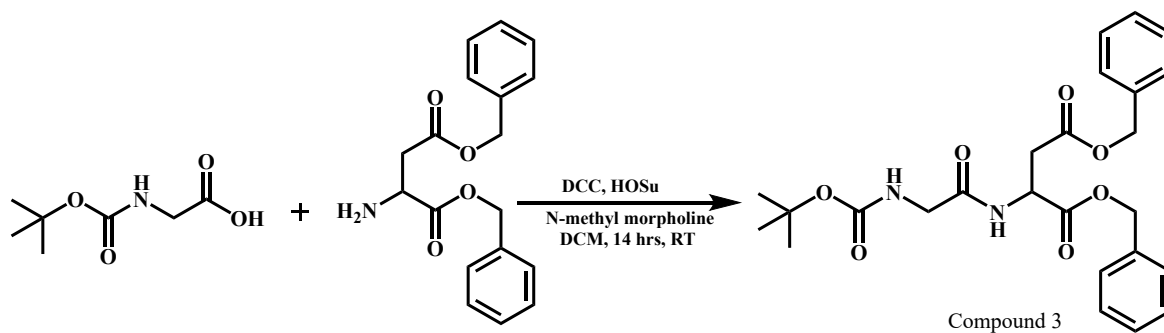

### Synthesis of Dibenzyl 2-(2-aminoacetamido) succinate (Compound 4):

To a stirred solution of dibenzyl 2-(2-((tert-butoxycarbonyl) amino) acetamido) succinate (2.35g, 0.005 mol) in dichloromethane (20 mL), added  $\text{CF}_3\text{COOH}$  (6 mL). After being stirred for 1 hr at rt, the reaction mixture was concentrated and precipitated with ethyl ether (200 mL). The white solid of N-de protected dibenzyl 2-(2-aminoacetamido) succinate was obtained by filtration in quantitative yield. Yield: 50%

$^1\text{H}$  NMR (500 MHz,  $\text{CDCl}_3$ ,  $\delta$ ): 7.40-7.26 (m, 6H), 7.28-7.20 (m, 4H), 5.28- 5.20 (m ,1H), 5.16-4.98 (m, 3H), 4.00-3.28 (m, 3H), 3.04-2.52 (m, 2H),  $^{13}\text{C}$  (100 MHz,  $\text{CDCl}_3$ ,  $\delta$ ): 172. 832,

170.100, 161.202, 160.710, 155.773, 140.703, 135.054, 134.824, 129.568, 127.239, 126.795, 64.615, 53.290, 42.242, 35.952. Cal. Mass: 370.40 Found: 392 (M+Na).

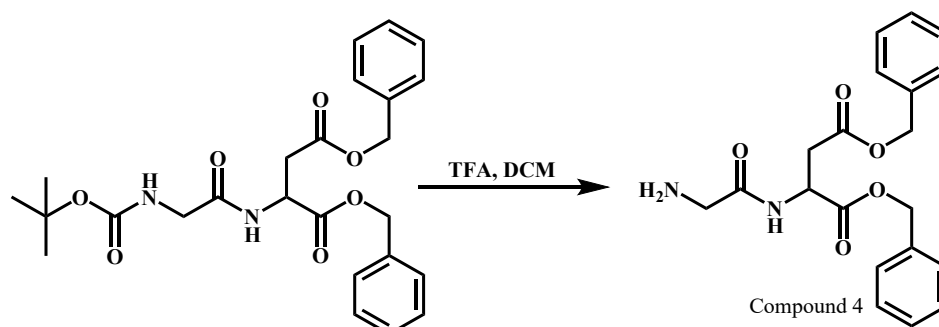

### Alkylated Perylene dibenzoic acid (Compound 5):

The commercialized di bromo perylene 0.5g (0.419 mol) was dissolved in 30 ml of toluene and benzene boronic ester (0.312g, 1.257 mol),  $K_2CO_3$  (0.200g, 2.09 mol) was added to this reaction mixture. To the reaction mixture catalytic amount of  $Pd(PPh_3)_2Cl_2$  was added and the mixture was refluxed for 24 hrs at 110 °C temperature. After time completion, toluene was evaporated by vacuum and the compound was isolated by column chromatography (hexane: EtOAc). A pink coloured solid was obtained with the yield of 60 %.

$^1H$  NMR (500 MHz,  $CDCl_3$ ,  $\delta$ ): 8.80-8.40 (m, 8H), 8.16-8.10 (m, 2H), 7.66-7.24 (m, 4H), 3.98-3.94 (m, 2H), 1.64-1.48 (m, 8H), 1.40-1.04 (m, 72 H), 0.92-0.80 (m, 12 H)  $^{13}C$  (100 MHz,  $CDCl_3$ ,  $\delta$ ): 142.756, 142.674, 143.318, 133.391, 133.263, 133.622, 132.520, 132.411, 132.250, 133.144, 131.648, 13.460, 129.862, 129.049, 128.912, 128.518, 128.593, 127.534, 126.907, 125.900, 125.176, 125.350. Cal. Mass: 1276.84 Found- 1295.97 (M+F).

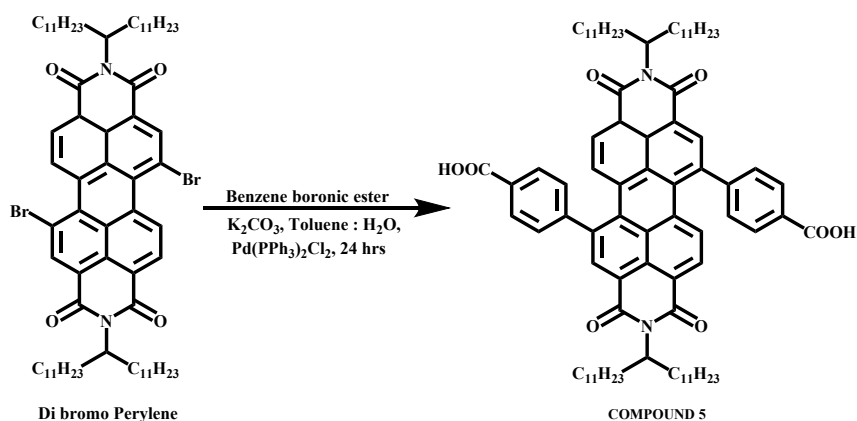

### Synthesis of Perylene di peptide (PDI-PEP):

0.130g (0.098 mol) of compound 5 was dissolved in dichloromethane (20 mL), 0.110 g (0.095 mol) of dibenzyl 2-(2-aminoacetamido) succinate, DCC (0.0063g, 0.030 mol), N-hydroxy succinimide (0.0045g, 0.038 mol) was added. The reaction was continued up to 24 hrs and removed the solvent by vacuum and the reaction mixture was isolated with the DCM and water and dried over Na<sub>2</sub>SO<sub>4</sub> and required compound was purified by using separation techniques. Yield: 80 %.

<sup>1</sup>H NMR (500 MHz, CDCl<sub>3</sub>, δ): 8.96-8.86 (m, 4H), 7.78-7.76 (m, 2H), 7.74-7.72 (m, 2H), 7.68-7.60 (m, 2H), 7.46-7.34 (m, 20H), 7.14-7.06 (m, 8H), 4.72-4.70 (m, 4H) 4.12-3.96 (m, 10H), 3.58-3.53 (m, 2H), 2.40-2.20 (m, 4H), 1.40-1.20 (m, 80H), 0.90-0.82 (m, 12 H) <sup>13</sup>C (100 MHz, CDCl<sub>3</sub>, δ): 1167.122, 166.531, 157.987, 153.098, 151.903, 150.339, 148.254, 147.612, 143.915, 143.132, 138.547, 98.189, 87.625, 74.432, 53.968, 51.392, 49.654, 48.388, 46.395, 42.451, 42.199, 33.565, 20.448, 19. Cal. Mass: 1982.60 Found: 1983.080 (M+1).

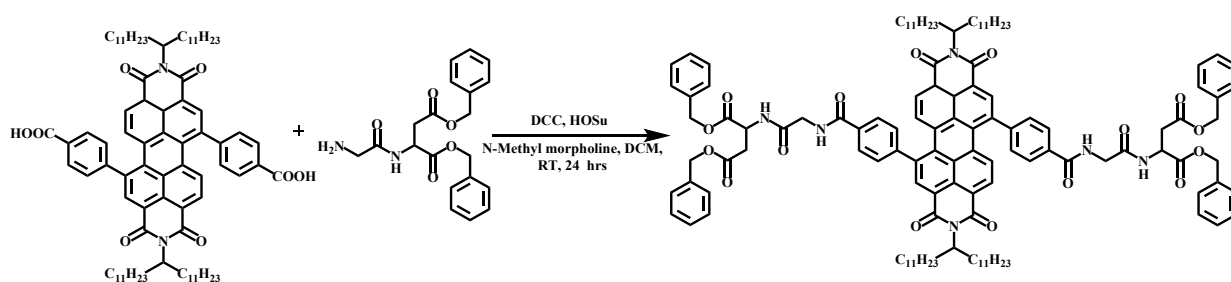

### Dipeptide thiophene diketopyrrolopyrrole (DPP-PEP):

In a sealed tube dibromo thiophene diketopyrrolopyrrole (dibromo DPP) 0.100 g (0.410 mol) was dissolved in toluene 20 mL, to this reaction mixture NaO<sup>t</sup>Bu (0.050 mg, 1.230 mol), dibenzyl 2-(2-aminoacetamido) succinate (0.163 g, 1.230 mol), triphenyl phosphine 20 mg was added. The reaction mixture was purged with nitrogen gas up to 30 min, added catalytic amount of Pd<sub>2</sub>(dba)<sub>3</sub>. The reaction mixture was refluxed at 110 °C up to 24 hr, after the completion of the reaction the toluene was removed by using rotary evaporator and extracted with the organic solvent and brine solution. The organic layer was collected the reduced the solvent by vacuum, purified by column chromatograph. Yield: 60%.

<sup>1</sup>H NMR (500 MHz, CDCl<sub>3</sub>, δ): 8.86-8.64 (m, 4H), 7.78-7.72 (m, 4H), 7.66-7.60 (m, 6H), 7.44-7.36 (m, 10H), 7.12-7.00 (m, 4H), 5.40-4.50 (m, 4H), 4.20-3.98 (m, 10 H), 1.40-1.20 (m, 18H),

1.06-1.08 (m, 12 H)  $^{13}\text{C}$  (100 MHz,  $\text{CDCl}_3$ ,  $\delta$ ): 161.720, 143.502, 140.396, 135.228, 134.758, 132.104, 131.915, 130.467, 130.030, 128.930, 128.526, 128.357, 126.095, 125.383, 125.497, 45.826, 39.639, 31.885, 31.165, 29.662, 28.324, 24.735, 23.504, 23.025, 22.658. 21.965, 14.093, 13.99. 10.45. MALDI-TOF: Experimental: 1260.52 Found: 1299.47 (M+K).

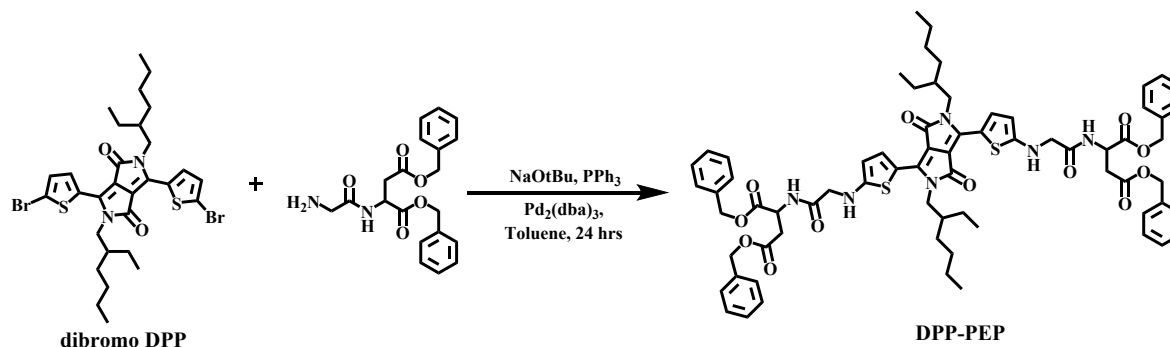

### Computational Details

Time-Dependent DFT (TDDFT) and Density Functional Theory (DFT) calculations were performed using the *Gaussian09* program.<sup>1</sup> The **PDI-PEP** and **DPP-PEP** with neutral charge were optimized in the gas phase. B3LYP exchange-correlation functional with Hay and Wadt's double zeta quality Los Alamos electron effective core potential basis set 6-311 g (d,p) was adopted on all atoms.<sup>2-4</sup> The optimized geometries were analyzed by vibrational frequencies, resulting in no imaginary frequencies. Thus, the optimized structures correspond to absolute minima on the potential energy surface. At the optimized geometry, TDDFT calculations were performed at B3LYP/6-311 g (d,p) level of theory in dichloromethane solvent utilizing the Polarizable Continuum Model<sup>5,6</sup> (PCM), as implemented in *Gaussian 09.50* singlet-singlet excitations at  $S_0$  optimized geometry are calculated. The software *GaussSum 2.2.5*<sup>7</sup> was used to simulate the major portion of the absorption spectrum and to interpret the nature of transitions. The *Gaussview*<sup>8</sup> was used to make molecular orbital surfaces and *GaussSum* software was used to calculate the percentage contributions of the **PDI-PEP** and **DPP-PEP** molecular orbitals.

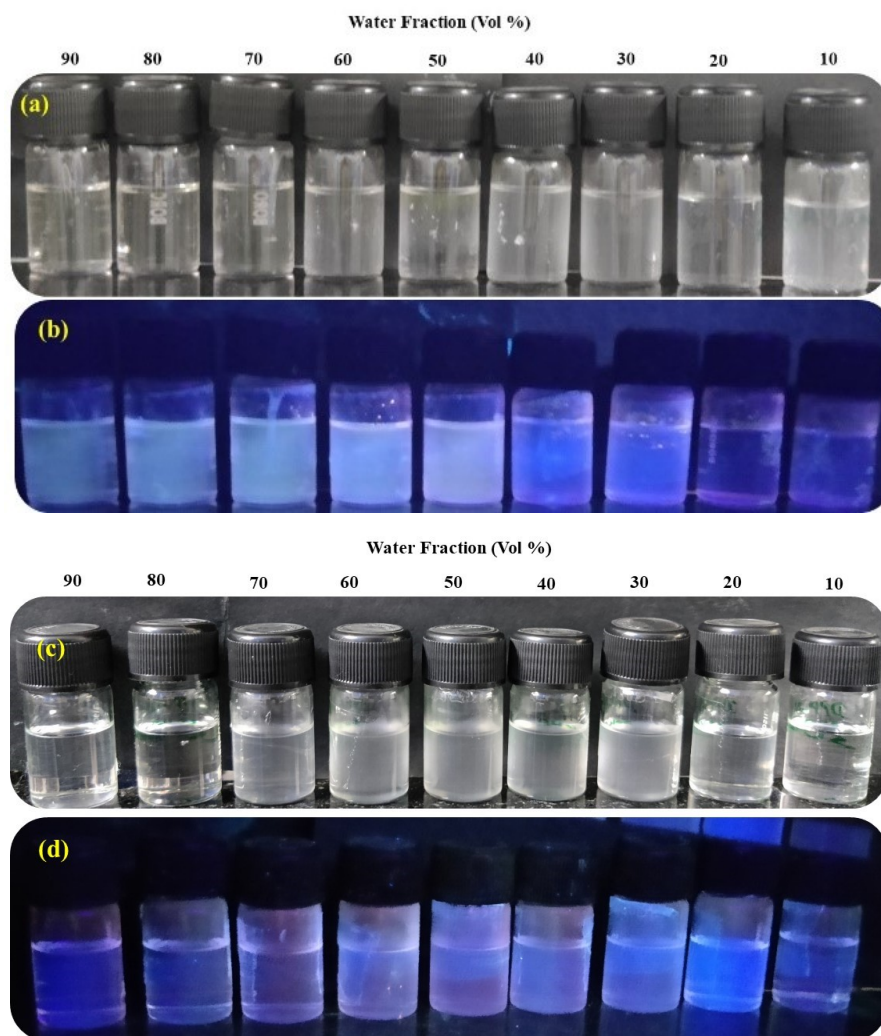

**Figure S1.** UV absorption images of the molecules of **PDI-PEP** (a,b) and **DPP-PEP** (c,d) under normal light and 365 nm.

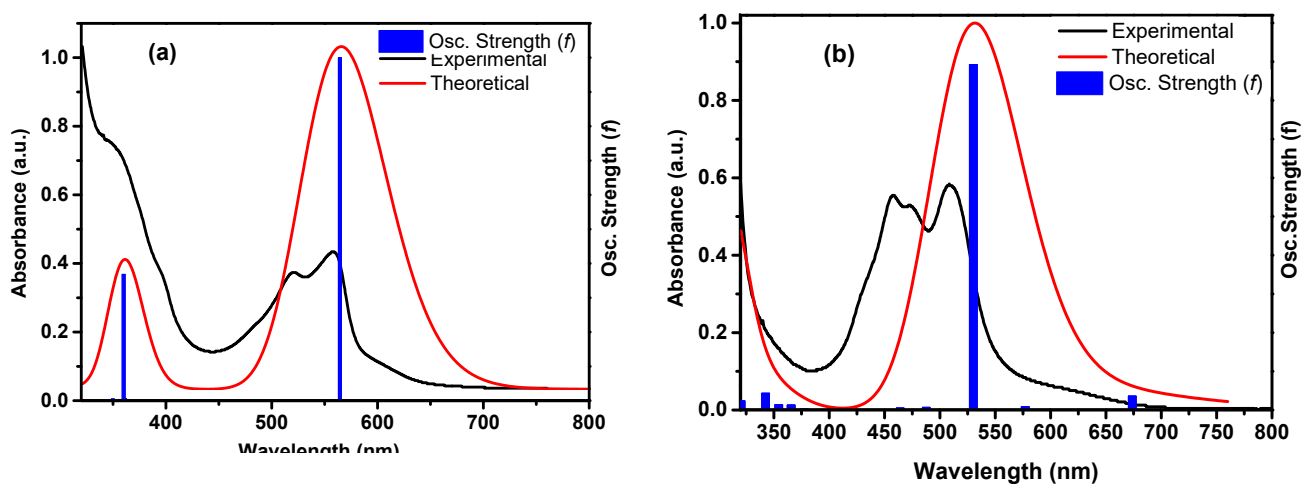

**Figure S2.** Normalized plots of experimental and simulated absorption spectra of (A) **DPP-PEP** (B) **PDI-PEP**



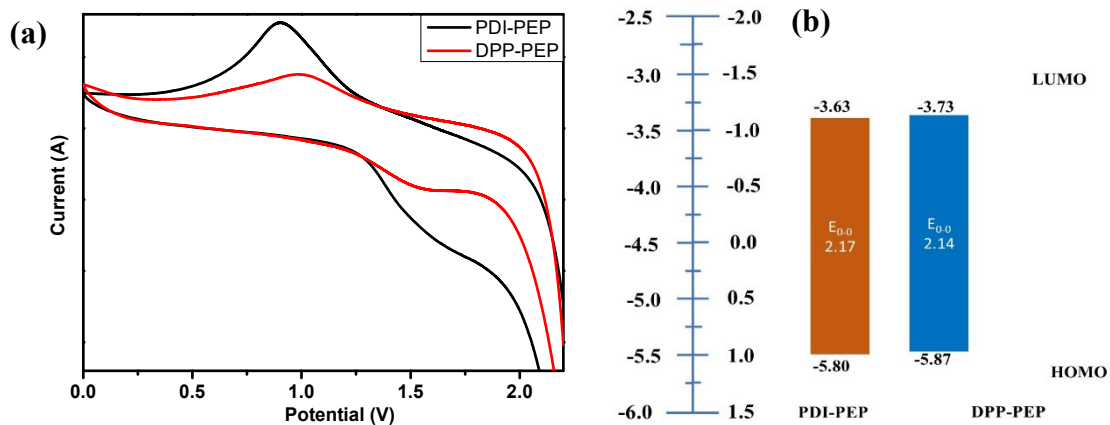

Figure S3.

(a) Cyclic voltammogram (b) Energy level diagram of PDI-PEP and DPP-PEP

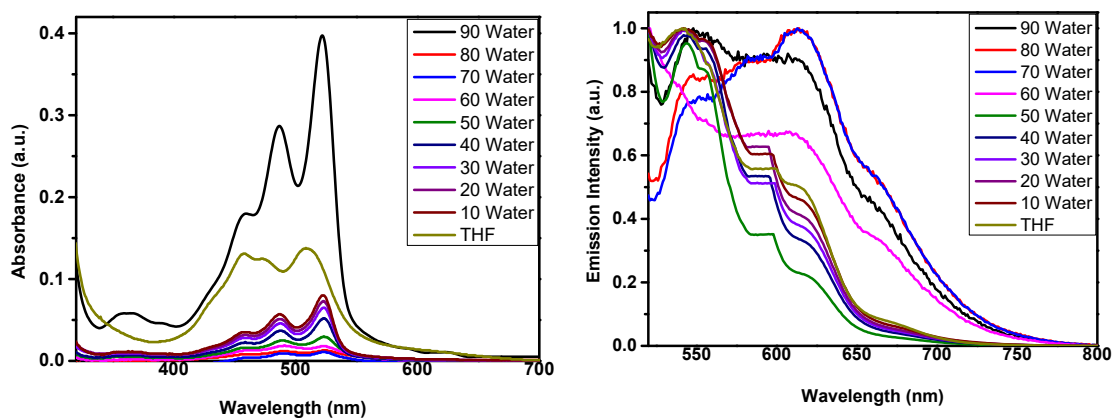

Figure S4. Aggregated emission in THF in water (fw) for PDI-PEP a) absorption and b) emission

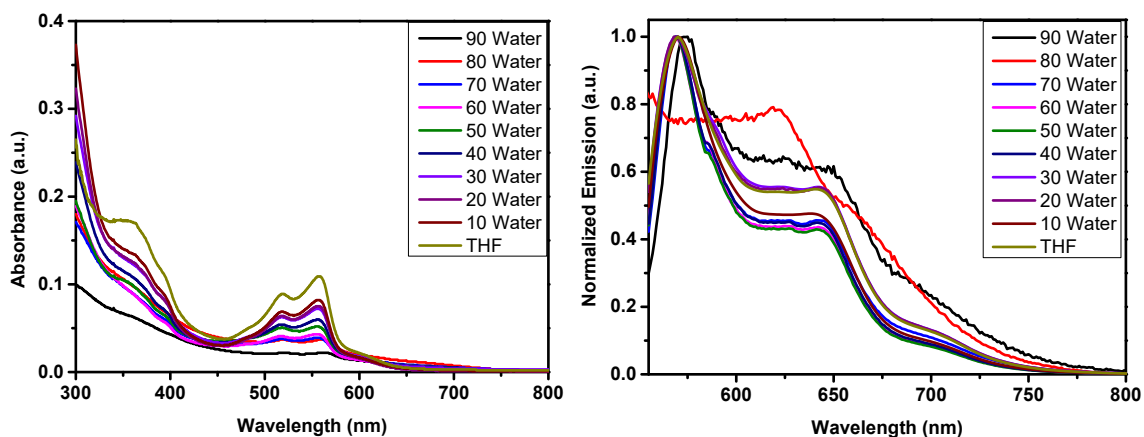

Figure S5. Aggregated emission in THF in water (fw) for DPP-PEP a) absorption and b) emission.

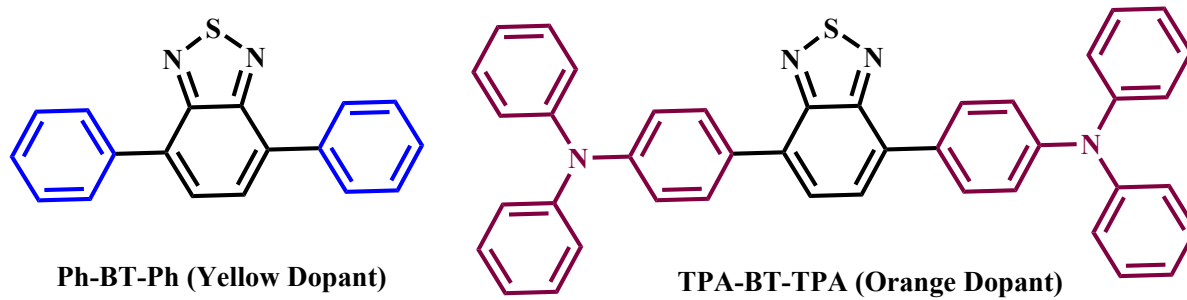

**Figure S6.** Chemical Structures of the Dopants

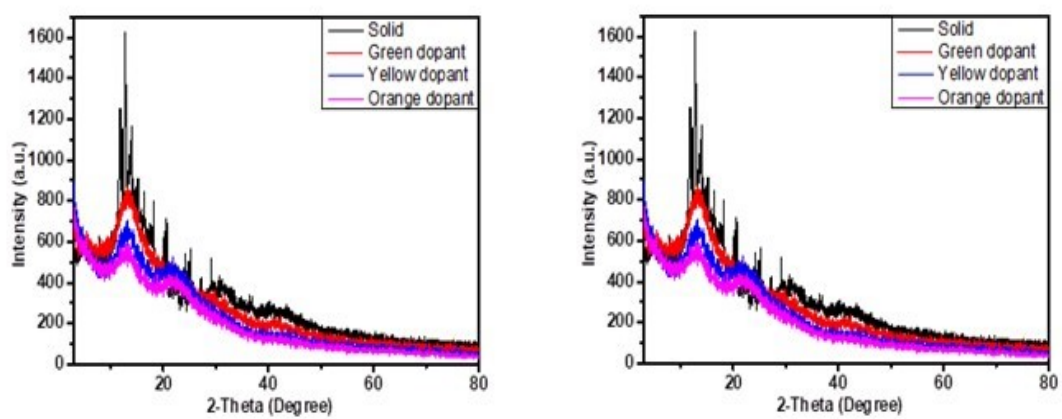

**Figure S7.** PXRD analysis of the molecules for comparison with different dopants, a) PDI-PEP and 2) DPP-PEP.

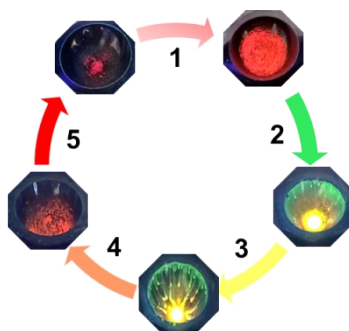

**Figure S8.** Halochromism effect of **DPP-PEP**, 1. Grinding, 2. TFA addition, 3. After 2 mins, 4. After 10 mins, 5. After few mins.

**Table S1. Optical Parameters of DPP-PEP and PDI-PEP**

| Molecule Name  | $\lambda_{\max}$ [nm] <sup>a</sup> | HOMO [eV] <sup>b</sup> | LUMO (eV) <sup>b</sup> | $E_{0-0}$ <sup>c</sup> |
|----------------|------------------------------------|------------------------|------------------------|------------------------|
| <b>DPP-PEP</b> | 555                                | -5.87                  | -3.73                  | 2.14                   |
| <b>PDI-PEP</b> | 520                                | -5.80                  | -3.63                  | 2.17                   |

a. UV-Absorption spectra were recorded in DCM solution at 298K, b. Highest occupied molecular orbital values were calculated by adding 4.80 to  $E_{\text{oxd}}$ ; Lowest unoccupied molecular orbital was calculated by  $\text{LUMO} = E_{0-0} - \text{HOMO}$  d. The bandgap,  $E_{0-0}$ , was calculated from the intersection point of the absorption and emission spectra

**Table S2. Solvatochromism UV absorption, emission and their molar extinction coefficient values of the **DPP-PEP** and **PDI-PEP**.**

| Solvent | DPP- PEP |                                | PDI-PEP |                                | EMISSION (nm) |         |
|---------|----------|--------------------------------|---------|--------------------------------|---------------|---------|
|         | UV (nm)  | Mol. Ext. Coeff ( $\epsilon$ ) | UV (nm) | Mol. Ext. Coeff ( $\epsilon$ ) | DPP-PEP       | PDI-PEP |
| TOL     | 556      | 7975                           | 508     | 6310                           | 565           | 541     |

|     |     |       |     |       |     |     |
|-----|-----|-------|-----|-------|-----|-----|
| DCM | 560 | 9560  | 515 | 16359 | 568 | 539 |
| THF | 551 | 10970 | 508 | 15358 | 570 | 543 |
| ACN | 557 | 20930 | 509 | 14355 | 570 | 536 |
| DMF | 560 | 17085 | 511 | 12301 | 574 | 539 |

**Table S3.** Experimental  $\lambda_{\max}$ , calculated  $\lambda_{\max}$ , (nm) and oscillator strengths (f) of **DPP-PEP** in DCM solvent, calculated at B3LYP/6-311g (d,p):

**Table S4.** Experimental  $\lambda_{\max}$ , calculated  $\lambda_{\max}$ , (nm) and oscillator strengths (f) of **PDI-PEP** in DCM solvent, calculated at B3LYP/6-311g (d,p):

| State | Wavelength (nm) | Osc. Strength | Major Contributions                                                   | Minor Contributions                                                             |
|-------|-----------------|---------------|-----------------------------------------------------------------------|---------------------------------------------------------------------------------|
| S1    | 520.391         | 1.1163        | HOMO->LUMO (97%)                                                      |                                                                                 |
| S1    | 859.324         | 0.0025        | H-3->LUMO (26%), H-1->LUMO (26%), HOMO->L+1 (46%)                     | HOMO->L+1 (4%), HOMO->L+4 (5%)                                                  |
| S2    | 336.445         | 0.0053        | H-1->LUMO (98%)                                                       | HOMO->L+5 (5%), HOMO->L+13 (6%)                                                 |
| S2    | 714.766         | 0.0264        | H-3->LUMO (69%), H-1->LUMO (16%), HOMO->L+1 (10%)                     | H-3->L+16 (2%)                                                                  |
| S3    | 324.393         | 0.002         | H-1->LUMO (98%)                                                       |                                                                                 |
| S3    | 618.031         | 0.005         | H-1->LUMO (31%), HOMO->L+1 (61%), H-1->L+1 (97%)                      | HOMO->LUMO (3%), H-2->L+1 (3%)                                                  |
| S4    | 309.362         | 0.0088        | H-2->LUMO (94%), HOMO->L+4 (49%), HOMO->L+5 (33%)                     | HOMO->L+1 (6%), HOMO->L+2 (3%), HOMO->L+6 (7%)                                  |
| S5    | 307.102         | 0.7509        | H-14->LUMO (87%), HOMO->L+5 (49%)                                     | H-15->L+1 (4%), HOMO->L+2 (5%), HOMO->L+3 (4%)                                  |
| S5    | 528.600         | 0.0038        | H-1->L+17 (18%), HOMO->L+17 (71%)                                     | H-15->LUMO (3%), H-15->L+16 (3%)                                                |
| S6    | 281.934         | 0.0003        | H-15->LUMO (77%), HOMO->L+9 (11%), H-15->L+13 (10%)                   | HOMO->L+5 (4%), H-14->L+1 (6%), H-14->L+8 (5%)                                  |
| S6    | 505.106         | 0.0023        | H-1->L+18 (15%), HOMO->L+18 (18%), HOMO->L+12 (18%), HOMO->L+13 (27%) | H-15->LUMO (3%), HOMO->L+5 (3%), HOMO->L+7 (4%), HOMO->L+14 (4%)                |
| S7    | 263.996         | 0.0002        | H-15->LUMO (77%), HOMO->L+13 (10%)                                    | HOMO->L+11 (6%), H-10->L+1 (9%)                                                 |
| S7    | 262.198         | 0.0001        | H-13->LUMO (36%), HOMO->L+6 (26%), HOMO->L+8 (22%), HOMO->L+16 (39%)  | HOMO->L+4 (4%), H-13->L+1 (4%), H-13->L+5 (3%), HOMO->L+1 (7%), HOMO->L+16 (7%) |
| S8    | 418.579         | 0.0005        | H-2->L+1 (85%), H-13->LUMO (30%), HOMO->L+16 (28%)                    | H-13->L+1 (5%), H-11->L+1 (5%), H-9->LUMO (7%)                                  |
| S9    | 260.343         | 0.0001        | H-2->LUMO (78%)                                                       | H-1->L+2 (6%), HOMO->L+6 (9%), HOMO->L+12 (9%)                                  |
| S9    | 406.582         | 0.0084        | HOMO->L+8 (19%), HOMO->L+9 (33%)                                      | H-2->L+11 (3%), H-17->L+1 (7%), H-8->L+1 (9%)                                   |
| S10   | 251.451         | 0.0221        | HOMO->L+11 (41%), HOMO->L+13 (32%), H-18->L+13 (14%), H-8->L+1 (17%)  | H-2->L+11 (3%), H-17->L+1 (7%), H-8->L+1 (9%)                                   |
| S11   | 395.493         | 0.0089        | H-9->L+1 (14%), H-7->L+1 (14%), HOMO->L+19 (44%)                      | H-2->L+1 (8%), H-18->L+1 (7%), H-1->L+1 (7%), H-1->L+16 (6%)                    |
| S11   | 248.369         | 0.1554        |                                                                       |                                                                                 |
| S12   | 383.611         | 0.0322        |                                                                       |                                                                                 |
| S12   | 247.877         | 0.1716        |                                                                       |                                                                                 |
| S13   | 361.351         | 0.0166        |                                                                       |                                                                                 |
| S12   | 239.317         | 0.0043        |                                                                       |                                                                                 |
| S12   | 353.793         | 0.0007        |                                                                       |                                                                                 |
| S14   | 230.362         | 0.0053        |                                                                       |                                                                                 |
| S13   | 351.386         | 0.0317        |                                                                       |                                                                                 |
| S15   | 226.350         | 0.0101        |                                                                       |                                                                                 |
| S14   | 304             | 0.03027       |                                                                       |                                                                                 |
| S15   | 347.837         | 0.0005        | HOMO->L+7 (30%), HOMO->L+9 (25%)                                      | H-15->L+1 (8%), HOMO->L+11 (5%)                                                 |

**Table S5.** Molecular orbital pictures of **DPP-PEP** calculated at B3LYP/6-311g (d,p) level of theory.

|                |
|----------------|
| <b>DPP-PEP</b> |
|----------------|

|                                                                                               |                                         |                                                                                                |                                         |
|-----------------------------------------------------------------------------------------------|-----------------------------------------|------------------------------------------------------------------------------------------------|-----------------------------------------|
| HOMO<br>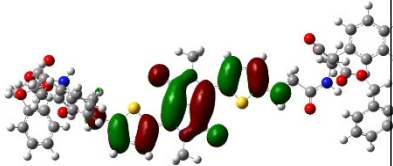     | DPP (49%)<br>THIA (39%)<br>LINKER (12%) | LUMO<br>     | DPP (56%)<br>THIA (38%)<br>LINKER (6%)  |
| HOMO-1<br>   | DPP (18%)<br>THIA (52%)<br>LINKER (30%) | LUMO+1<br>   | DPP (90%)<br>THIA (3%)<br>LINKER (3%)   |
| HOMO-2<br>   | DPP (84%)<br>THIA (16%)<br>LINKER (34%) | LUMO+2<br>   | DPP (50%)<br>THIA (37%)<br>LINKER (14%) |
| HOMO-3<br> | DPP (99%)<br>THIA (1%)<br>LINKER (0%)   | LUMO+3<br> | DPP (0%)<br>THIA (0%)<br>LINKER (100%)  |
| HOMO-4<br> | DPP (94%)<br>THIA (16%)<br>LINKER (0%)  | LUMO+4<br> | DPP (0%)<br>THIA (0%)<br>LINKER (100%)  |

**Table S6.** Molecular orbital pictures of **PDI-PEP** calculated at B3LYP/6-311 g (d,p) level of theory.

**PDI-PEP**

|                                                                                               |                                          |                                                                                                |                                          |
|-----------------------------------------------------------------------------------------------|------------------------------------------|------------------------------------------------------------------------------------------------|------------------------------------------|
| HOMO<br>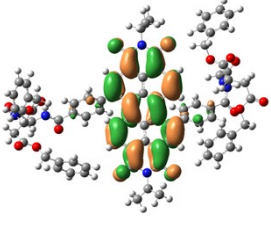     | PDI (99%)<br>BENZO (1%)<br>LINKER (0%)   | LUMO<br>     | PDI (96%)<br>BENZO (4%)<br>LINKER (0%)   |
| HOMO-1<br>   | PDI (85%)<br>BENZO (13%)<br>LINKER (1%)  | LUMO+1<br>   | PDI (0%)<br>BENZO (1%)<br>LINKER (99%)   |
| HOMO-2<br>  | PDI (40%)<br>BENZO (45%)<br>LINKER (15%) | LUMO+2<br>  | PDI (34%)<br>BENZO (48%)<br>LINKER (18%) |
| HOMO-3<br> | PDI (1%)<br>BENZO (97%)<br>LINKER (2%)   | LUMO+3<br> | PDI (1%)<br>BENZO (1%)<br>LINKER (98%)   |
| HOMO-4<br> | PDI (85%)<br>BENZO (13%)<br>LINKER (1%)  | LUMO+4<br> | PDI (1%)<br>BENZO (1%)<br>LINKER (98%)   |

**Table S7.** Aggregation emission and respective UV absorption of the **DPP-PEP** and **PDI-PEP**.

| % <i>f<sub>w</sub></i> of Water | DPP-PEP |               |          | PDI-PEP |               |          |
|---------------------------------|---------|---------------|----------|---------|---------------|----------|
|                                 | UV (nm) | EMISSION (nm) | PLQY (%) | UV (nm) | EMISSION (nm) | PLQY (%) |
| THF                             | 554     | 570           | 0.0548   | 508     | 543           | 0.06536  |



| <b>DPP-PEP</b><br>% <i>f<sub>w</sub></i> of<br>Water | $\tau_1/\text{ns}$ | $\alpha_1$ (%) | $\tau_2/\text{ns}$ | $\alpha_2$ (%) | <b>Average<br/>lifetime<br/><math>\tau</math> (ns)</b> |         |
|------------------------------------------------------|--------------------|----------------|--------------------|----------------|--------------------------------------------------------|---------|
| 10                                                   | 556                | 570            | 0.01503            | 521            | 547                                                    | 0.00868 |
| 20                                                   | 569                | 569            | 0.01943            | 521            | 548                                                    | 0.00983 |
| 30                                                   | 569                | 569            | 0.01805            | 521            | 550                                                    | 0.02829 |
| 40                                                   | 556                | 570            | 0.02842            | 521            | 549                                                    | 0.01081 |
| 50                                                   | 558                | 569            | 0.02116            | 521            | 543                                                    | 0.06136 |
| 60                                                   | 557                | 570            | 0.01043            | 527            | 543                                                    | 0.0629  |
| 70                                                   | 558                | 570            | 0.0196             | 539            | 612                                                    | 0.06756 |
| 80                                                   | 563                | 620            | 0.00995            | 539            | 612                                                    | 0.07031 |
| 90                                                   | 565                | 574            | 0.01111            | 523            | 612                                                    | 0.07742 |

**Table S8.** TCPSC life-time data of d **PDI-PEP**.

| <b>PDI-PEP</b><br>% <i>f<sub>w</sub></i> of Water | $\tau_1/\text{ns}$     | $\alpha_1$ (%) | $\tau_2/\text{ns}$   | $\alpha_2$ (%) | <b>Average lifetime <math>\tau</math><br/>(ns)</b> |
|---------------------------------------------------|------------------------|----------------|----------------------|----------------|----------------------------------------------------|
| THF                                               | $0.002 \cdot 10^{-9}$  | 99.95          | $4.33 \cdot 10^{-9}$ | 0.05           | $0.82 \cdot 10^{-9}$                               |
| 90                                                | $1.57 \cdot 10^{-9}$   | 60.15          | $6.82 \cdot 10^{-9}$ | 39.85          | $5.46 \cdot 10^{-9}$                               |
| 80                                                | $0.81 \cdot 10^{-9}$   | 72.15          | $8.30 \cdot 10^{-9}$ | 27.49          | $6.72 \cdot 10^{-9}$                               |
| 70                                                | $0.63 \cdot 10^{-9}$   | 65.47          | $4.65 \cdot 10^{-9}$ | 34.53          | $3.82 \cdot 10^{-9}$                               |
| 60                                                | $0.83 \cdot 10^{-9}$   | 63.14          | $5.52 \cdot 10^{-9}$ | 36.86          | $4.55 \cdot 10^{-9}$                               |
| 50                                                | $1.00 \cdot 10^{-9}$   | 24.91          | $4.22 \cdot 10^{-9}$ | 75.00          | $3.98 \cdot 10^{-9}$                               |
| 40                                                | $0.76 \cdot 10^{-9}$   | 16.40          | $4.03 \cdot 10^{-9}$ | 83.60          | $3.91 \cdot 10^{-9}$                               |
| 30                                                | $0.0018 \cdot 10^{-9}$ | 99.99          | $4.32 \cdot 10^{-9}$ | 0.01           | $0.83 \cdot 10^{-9}$                               |
| 20                                                | $0.004 \cdot 10^{-9}$  | 100            | $4.34 \cdot 10^{-9}$ | 0.00           | $3.97 \cdot 10^{-9}$                               |
| 10                                                | $0.0015 \cdot 10^{-9}$ | 100            | $4.30 \cdot 10^{-9}$ | 0.00           | $4.15 \cdot 10^{-9}$                               |

|     |                         |       |                       |       |                       |
|-----|-------------------------|-------|-----------------------|-------|-----------------------|
| THF | $3.13 \times 10^{-9}$   | 56.98 | $5.70 \times 10^{-9}$ | 43.02 | $4.61 \times 10^{-9}$ |
| 90  | $0.0697 \times 10^{-9}$ | 84.42 | $2.83 \times 10^{-9}$ | 15.58 | $2.49 \times 10^{-9}$ |
| 80  | $0.70 \times 10^{-9}$   | 38.50 | $2.85 \times 10^{-9}$ | 61.50 | $2.56 \times 10^{-9}$ |
| 70  | $0.85 \times 10^{-9}$   | 22.92 | $4.29 \times 10^{-9}$ | 77.08 | $4.09 \times 10^{-9}$ |
| 60  | $0.46 \times 10^{-9}$   | 24.46 | $4.70 \times 10^{-9}$ | 75.54 | $4.57 \times 10^{-9}$ |
| 50  | $1.74 \times 10^{-9}$   | 36.55 | $6.72 \times 10^{-9}$ | 63.45 | $6.07 \times 10^{-9}$ |
| 40  | $2.18 \times 10^{-9}$   | 33.68 | $6.57 \times 10^{-9}$ | 66.32 | $5.93 \times 10^{-9}$ |
| 30  | $0.012 \times 10^{-9}$  | 100   | $5.34 \times 10^{-9}$ | 0.00  | $4.36 \times 10^{-9}$ |
| 20  | $3.20 \times 10^{-9}$   | 35.35 | $1.92 \times 10^{-9}$ | 55.15 | $2.58 \times 10^{-9}$ |
| 10  | $2.40 \times 10^{-9}$   | 39.09 | $6.08 \times 10^{-9}$ | 60.91 | $5.33 \times 10^{-9}$ |

**Table S9.** TCPSC life-time data of d **DPP-PEP**.

**Table S10.** TCPSC life-time data of d **DPP-PEP** and **PDI-PEP** in various solvents.

| Solvents | <b>DPP-PEP</b>        |                |                       |                |                              | <b>PDI-PEP</b>         |                |                       |                |                              |
|----------|-----------------------|----------------|-----------------------|----------------|------------------------------|------------------------|----------------|-----------------------|----------------|------------------------------|
|          | $\tau_1$ /ns          | $\alpha_1$ (%) | $\tau_2$ /ns          | $\alpha_2$ (%) | Average lifetime $\tau$ (ns) | $\tau_1$ /ns           | $\alpha_1$ (%) | $\tau_2$ /ns          | $\alpha_2$ (%) | Average lifetime $\tau$ (ns) |
| DCM      | $1.00 \times 10^{-9}$ | 3.79           | $5.91 \times 10^{-9}$ | 96.21          | $5.87 \times 10^{-9}$        | $0.922 \times 10^{-9}$ | 28.36          | $3.22 \times 10^{-9}$ | 71.64          | $2.99 \times 10^{-9}$        |
| THF      | $3.13 \times 10^{-9}$ | 56.98          | $5.70 \times 10^{-9}$ | 43.02          | $4.61 \times 10^{-9}$        | $0.002 \times 10^{-9}$ | 99.95          | $4.33 \times 10^{-9}$ | 0.05           | $0.82 \times 10^{-9}$        |
| TOL      | $0.39 \times 10^{-9}$ | 2.14           | $5.64 \times 10^{-9}$ | 97.88          | $5.63 \times 10^{-9}$        | $0.811 \times 10^{-9}$ | 23.64          | $3.13 \times 10^{-9}$ | 76.36          | $3.13 \times 10^{-9}$        |
| DMF      | $0.44 \times 10^{-9}$ | 1.89           | $5.98 \times 10^{-9}$ | 98.11          | $5.97 \times 10^{-9}$        | $1.13 \times 10^{-9}$  | 72.74          | $2.81 \times 10^{-9}$ | 27.26          | $1.94 \times 10^{-9}$        |
| ACN      | $0.42 \times 10^{-9}$ | 1.08           | $5.85 \times 10^{-9}$ | 98.92          | $5.84 \times 10^{-9}$        | $0.13 \times 10^{-9}$  | 80.75          | $3.85 \times 10^{-9}$ | 19.25          | $3.81 \times 10^{-9}$        |

**NMR, Mass Spectra:**

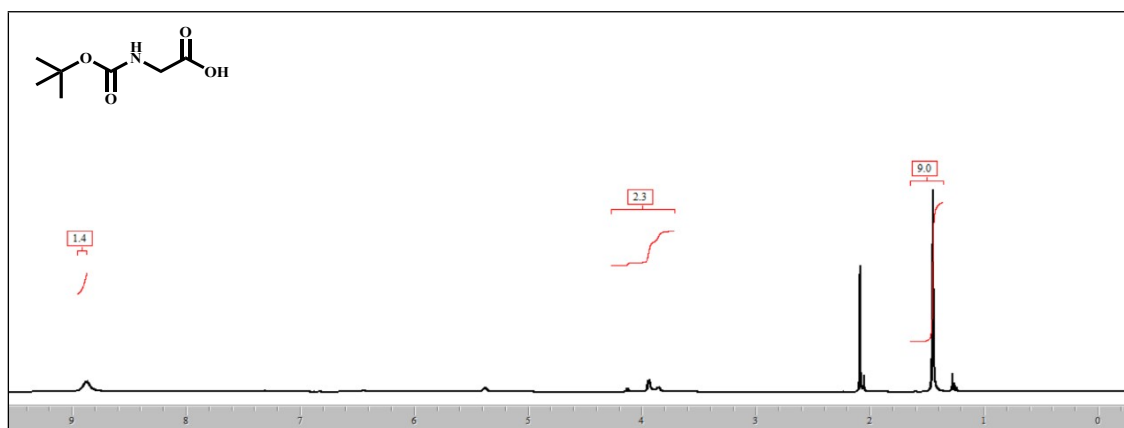

Figure S8. <sup>1</sup>H NMR spectrum of compound 1

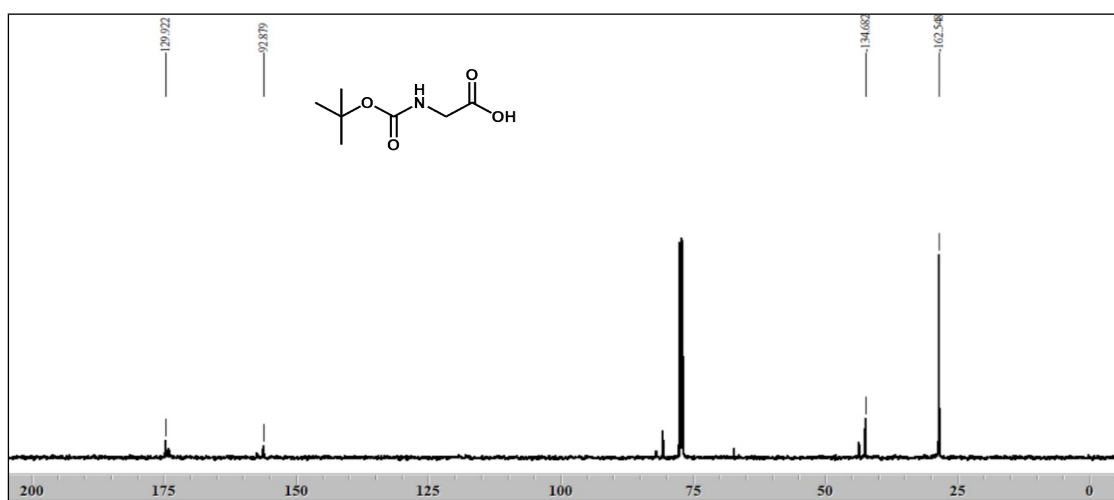

Figure S9 <sup>13</sup>C NMR spectrum of compound 1

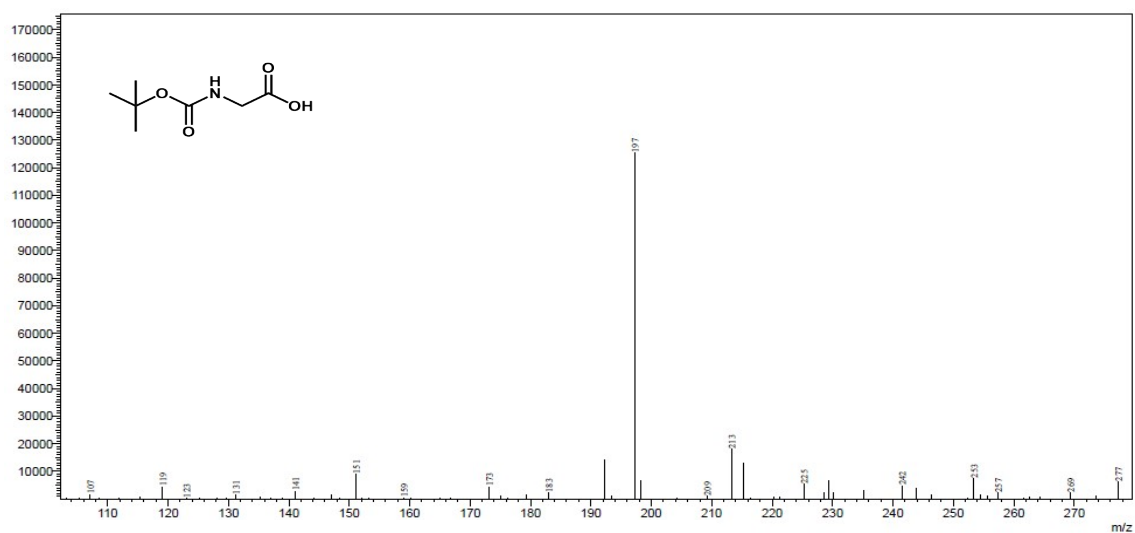

Figure S10. ESI-Mass spectrum of compound 1

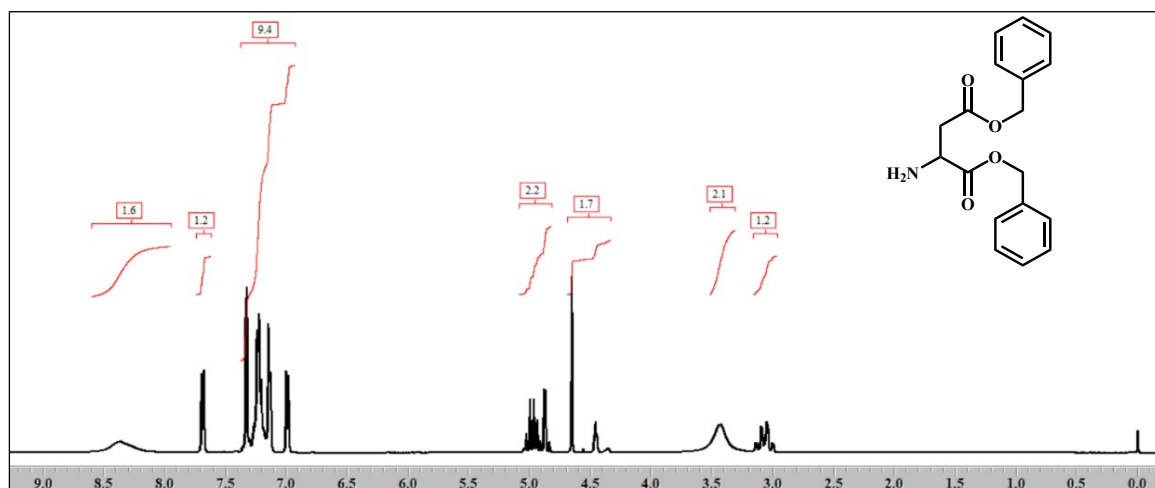

Figure S11.  $^1\text{H}$  NMR spectrum of compound 2

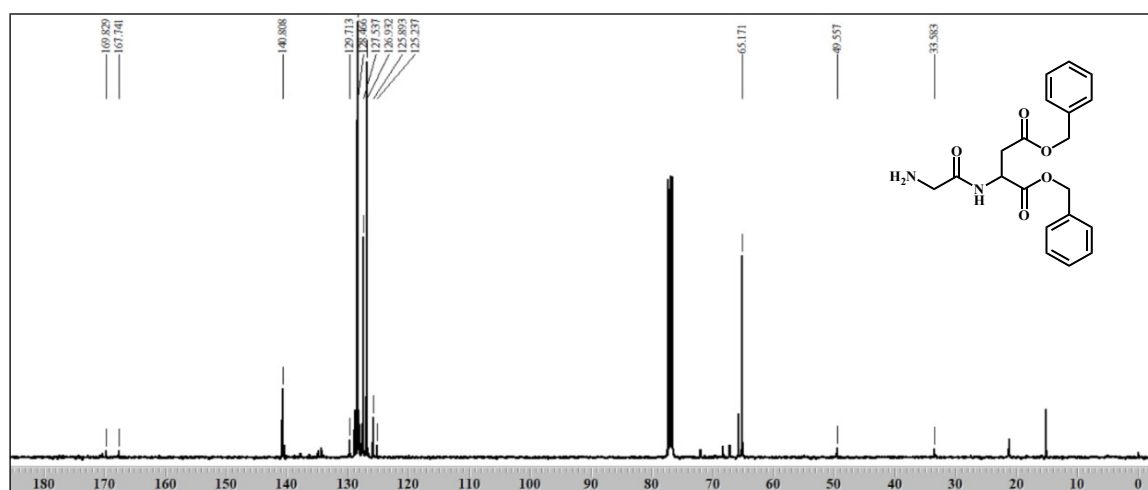

Figure S12.  $^{13}\text{C}$  NMR spectrum of compound 2

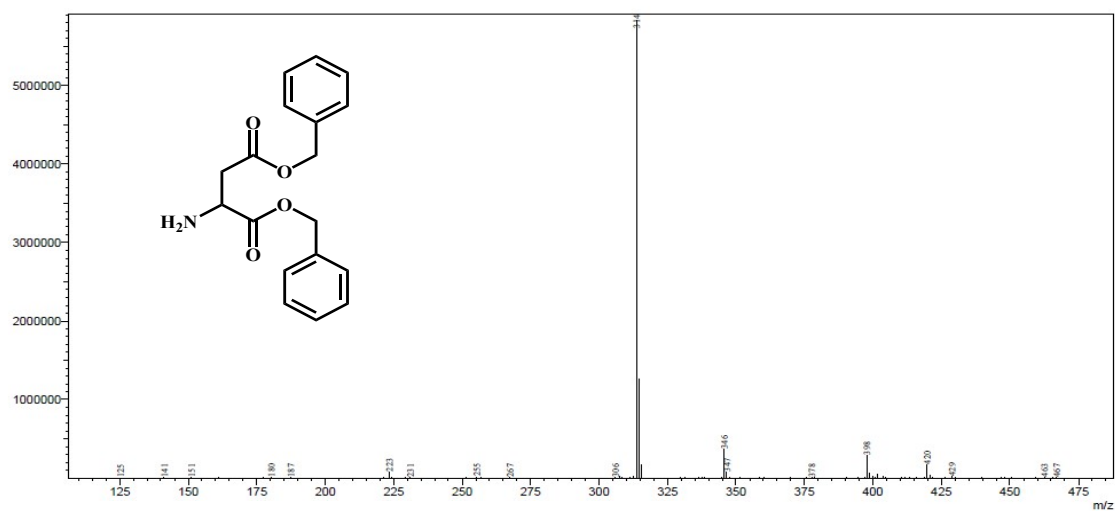

Figure S13. ESI-Mass spectrum of compound 2

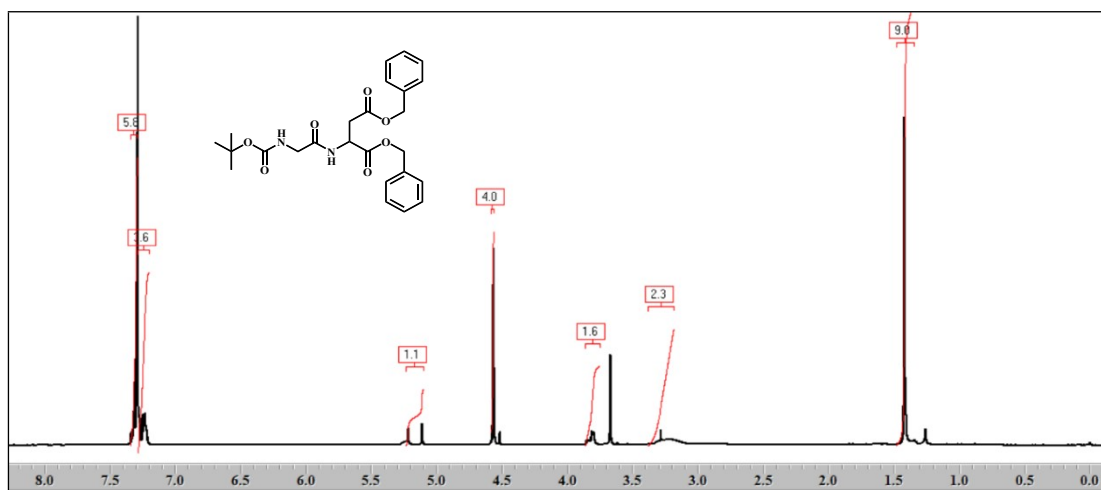

Figure S14. <sup>1</sup>H NMR spectrum of compound

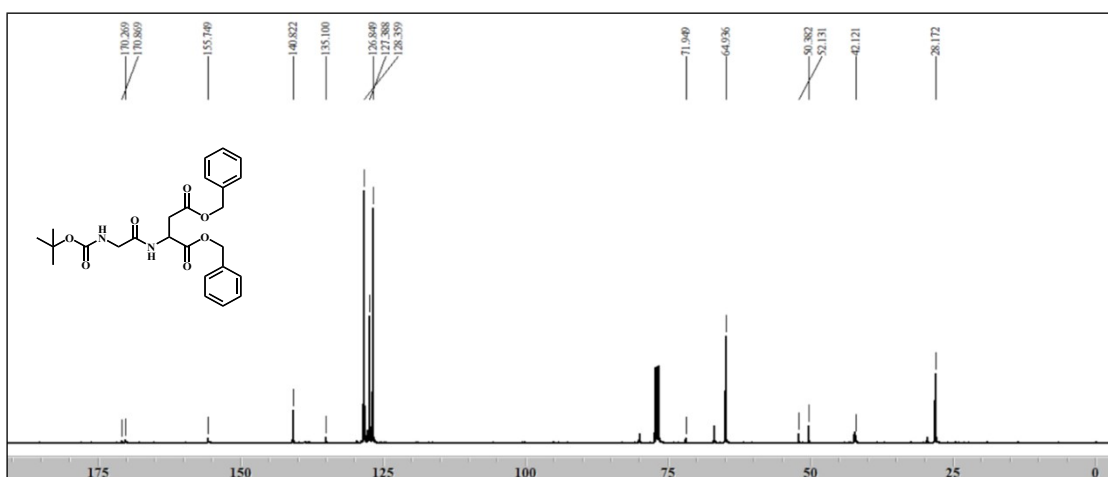

Figure S15. <sup>13</sup>C NMR spectrum of compound 3

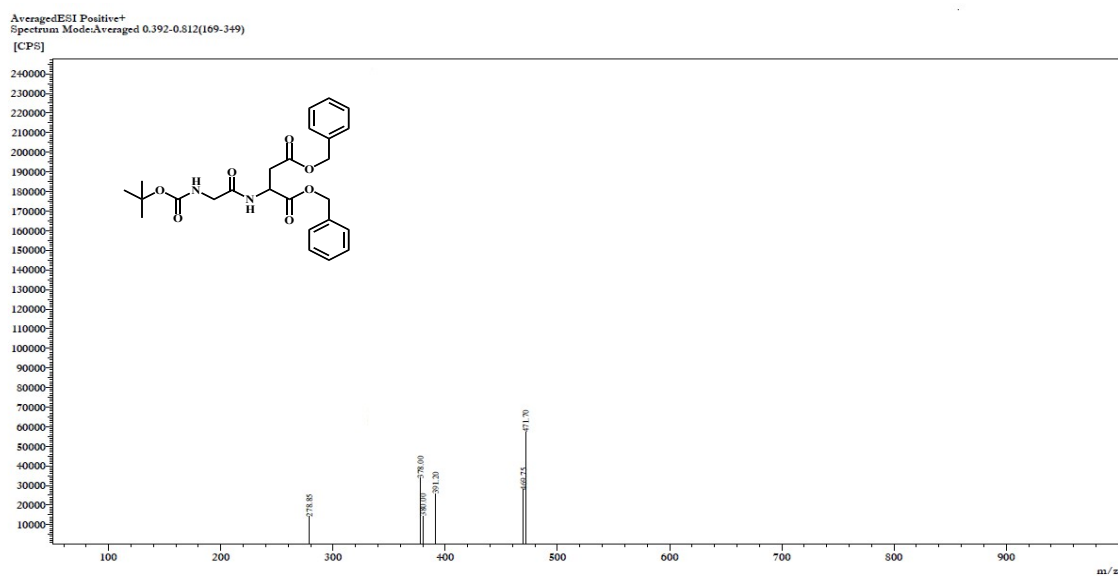

Figure S16. ESI-Mass spectrum of compound 3

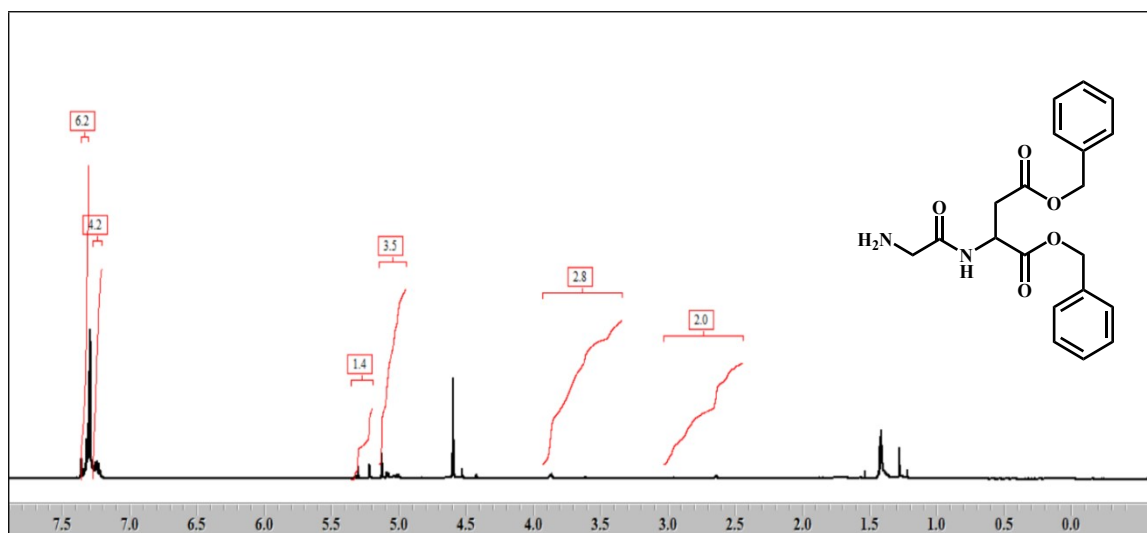

Figure S17.  $^1\text{H}$  NMR spectrum of compound 4

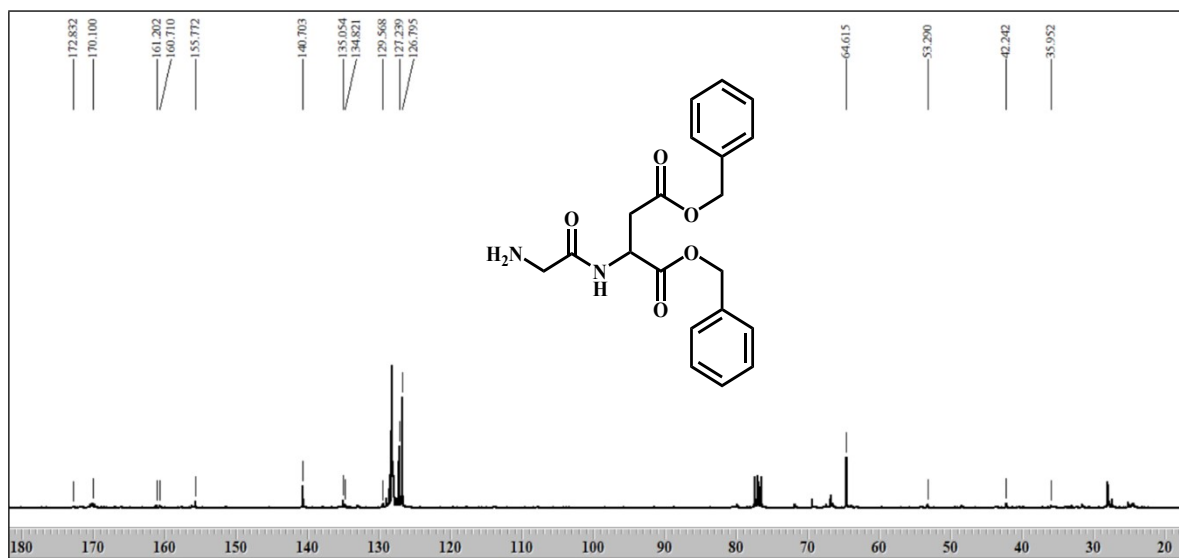

Figure S18.  $^{13}\text{C}$  NMR spectrum of compound 4

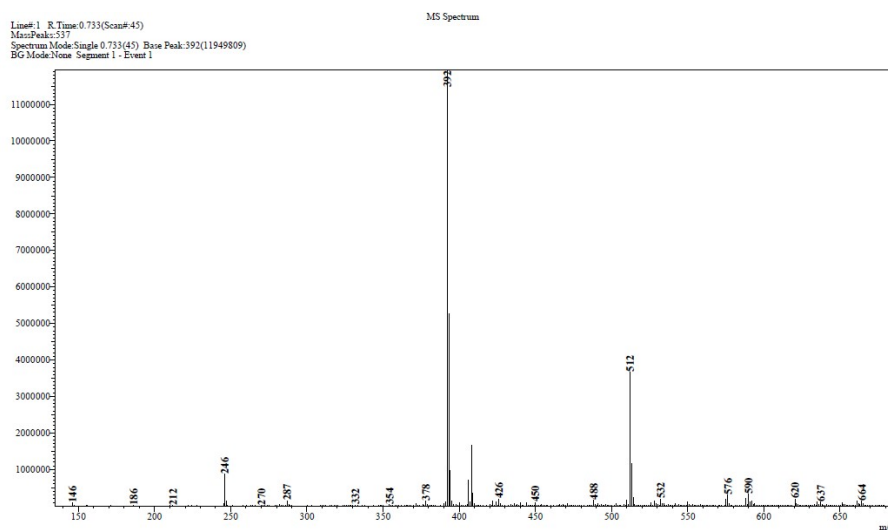

Figure S19. EIS spectrum of compound 4

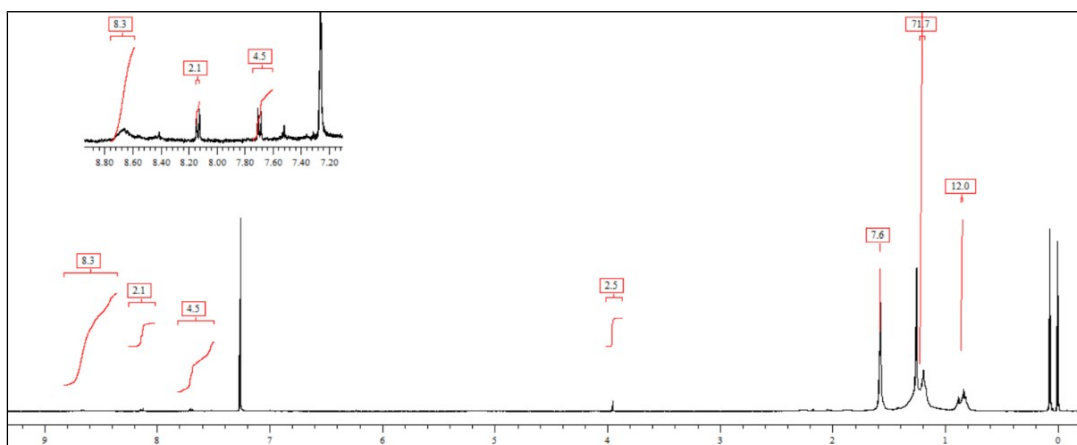

Figure S20. <sup>1</sup>H NMR spectrum of compound 5

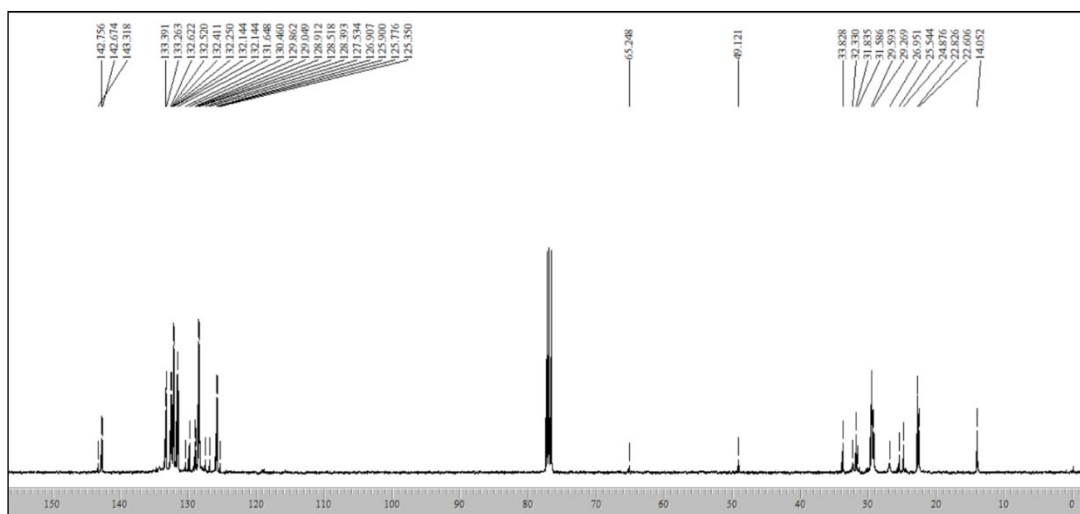

Figure S21. <sup>13</sup>C NMR spectrum of compound 5

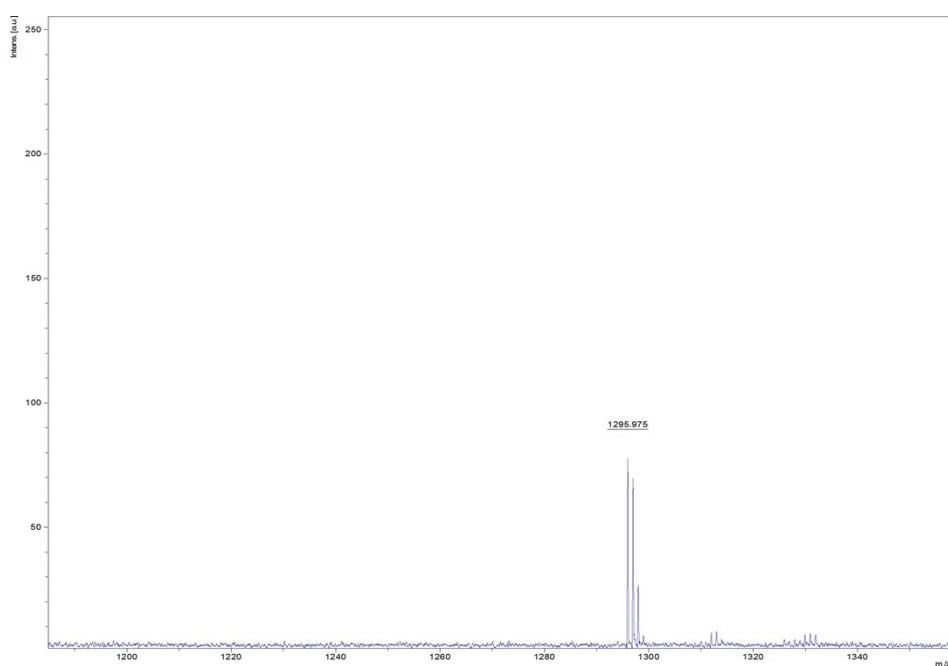

Figure S22. Mass spectrum of compound 5

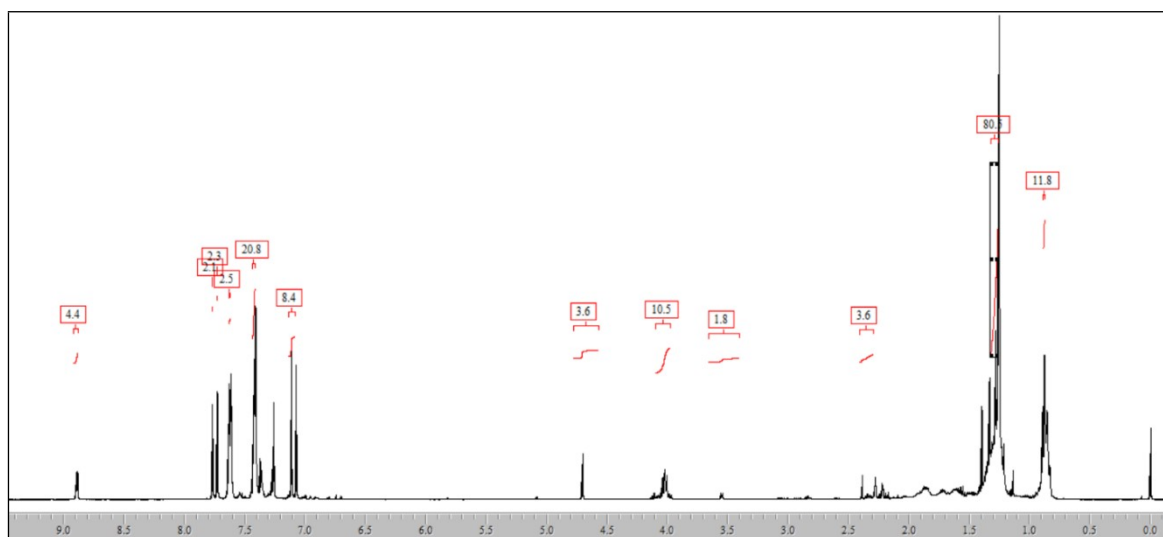

Figure S23. <sup>1</sup>H NMR spectrum of PER-PEP

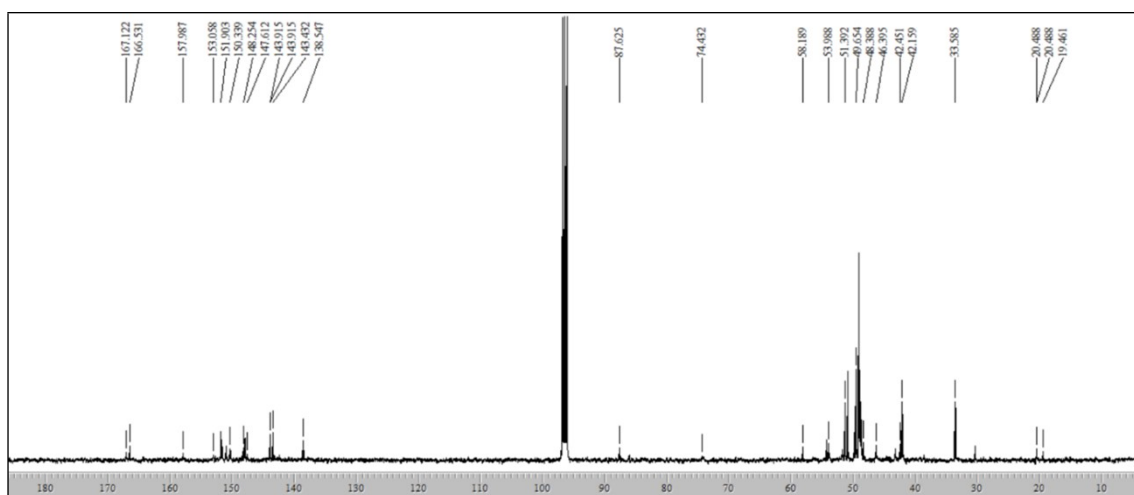

Figure S24. <sup>13</sup>C NMR spectrum of PER-PEP

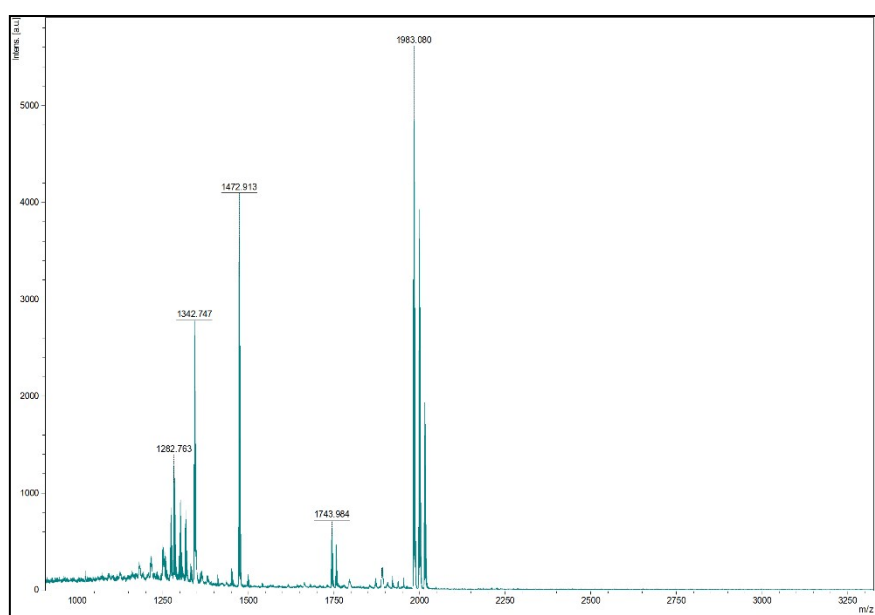

Figure S25. MALDI-TOF spectrum of PER-PEP



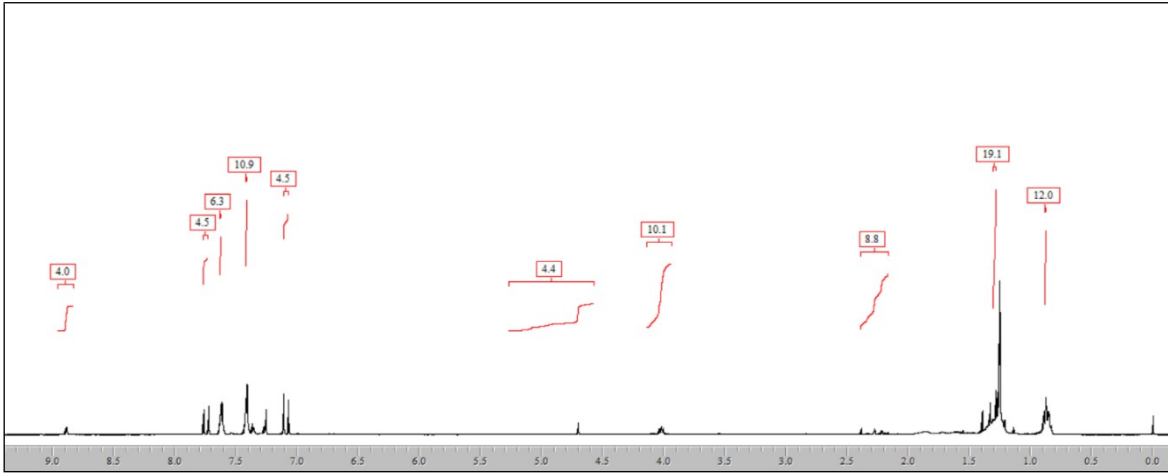

Figure S26. <sup>1</sup>H NMR spectrum of DPP-PEP

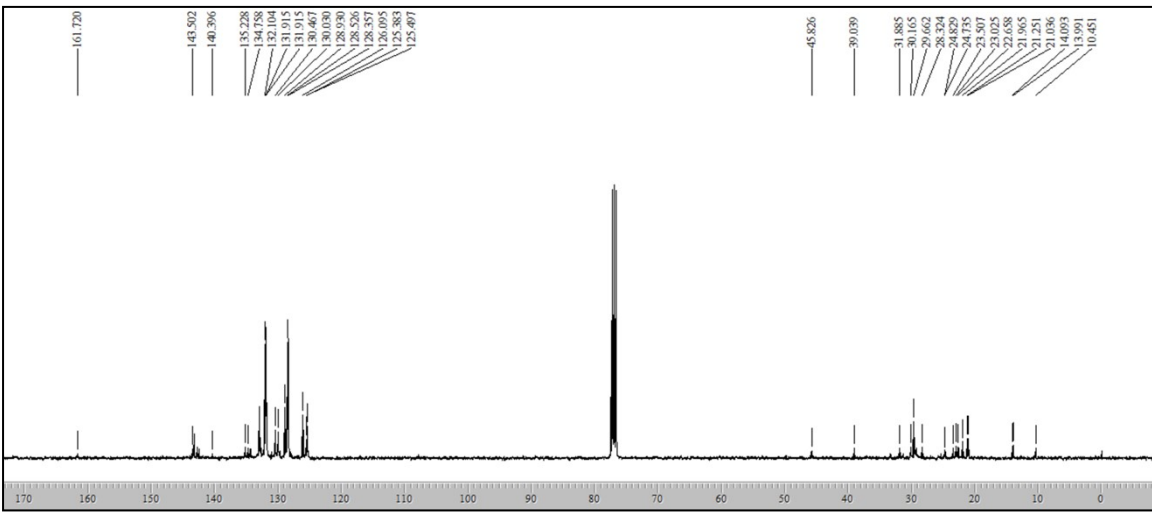

Figure S27. MALDI-TOF spectrum of DPP-PEP

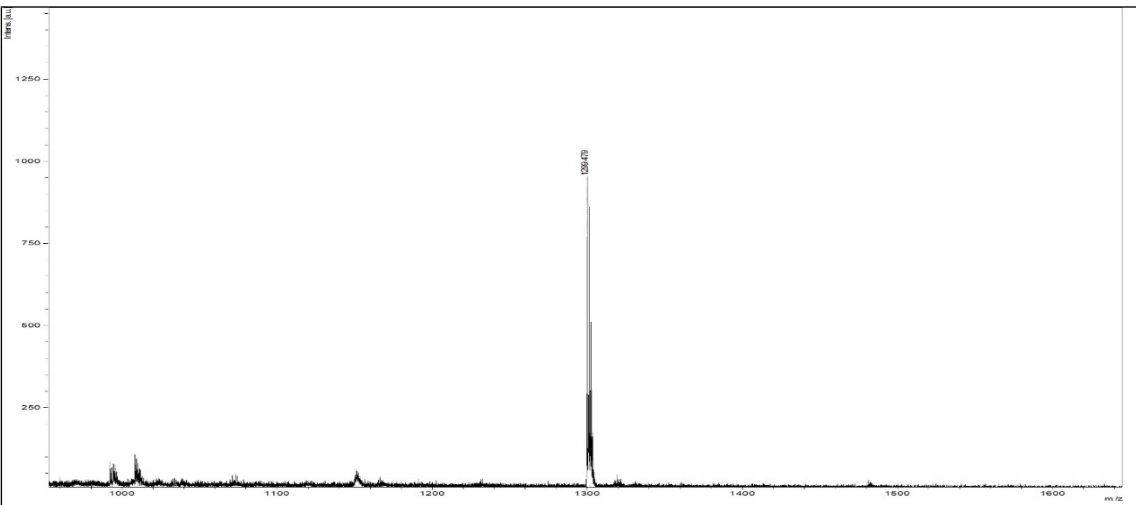

Figure S28. MALDI-TOF spectrum of DPP-PEP

## References

1. M. J. Frisch, G.W. Trucks, H. B. Schlegel, G. E. Scuseria, M.A. Robb, J. Cheeseman, R. G. Scalmani, V. Barone, B. Mennucci, G. A. Petersson, Gaussian 09, Revision B.01; Gaussian, Inc.: Wallingford., CT, 2010.
2. A. D. Becke, *J. Chem. Phys.*, 1993, **98**, 5648.
3. A. D. Becke, *J. Chem. Phys.*, 1996, **104**,1040
4. S. Miertuš, E. Scrocco, J. Tomasi, *J. Chem. Phys.*, 1981, **55**, 117-129.
5. M. Cossi, V. Barone, R. Cammi, Tomasi, *J. Chem. Phys. Lett.*, 1996, **255**, 327-335.
6. C.T. Lee, W.T. Yang, R.G. Parr, *Phys. Rev. B.*, 1988, **37**, 785-789.
7. N. M. O'Boyle, A. L. Tenderholt, K. M. Langner, *J. Comp. Chem.*, 2008, **29**, 839-845.
8. R. Dennington, T. Keith, J. Millam, Semichem Inc. Shawnee Mission KS, Gaussview, Version, 5. 2009.
